# Supplementary material for: Repurposing Castanea sativa By-Product Extract as a Potent Anti-inflammatory Agent
Source: Preprints.org preprint supplement (doi:10.20944/preprints202403.1600.v1), 2024-03-26
Supplement: Supplementary file 1 [file supplementary]

| Compound Name                                                                                   | Compound CID |
|-------------------------------------------------------------------------------------------------|--------------|
| Ellagic acid                                                                                    | 5281855      |
| Betaine                                                                                         | 247          |
| 5.7-dihydroxy-3.8-dimethoxy-2-phenyl-4h-chromen-4-one                                           | 9972910      |
| Mollioside                                                                                      | 28287201     |
| (±)-(2e)-abscisic acid                                                                          | 5375199      |
| 3.8-di-o-methylellagic acid                                                                     | 5488919      |
| 12-hydroxyjasmonic acid                                                                         | 5497122      |
| Epi-jasmonic acid                                                                               | 7251183      |
| Protocatechuic aldehyde                                                                         | 8768         |
| Gibberellin A2 o-beta-d-glucoside                                                               | 16019961     |
| Sinapaldehyde                                                                                   | 5280802      |
| 12-hydroxyjasmonic acid 12-o-beta-d-glucoside                                                   | 11966210     |
| 5.7-dihydroxy-3'.4'.5'-trimethoxyflavanone                                                      | 61988        |
| (+)-Gibberellic acid                                                                            | 6466         |
| N-propyl galiate                                                                                | 4947         |
| Syringaldehyde                                                                                  | 8655         |
| Retusin                                                                                         | 5352005      |
| Acaciin                                                                                         | 5317025      |
| Kaempferol                                                                                      | 5280863      |
| Scopoletin                                                                                      | 5280460      |
| Isorhamnetin 3-rhamnosyl- (1->2) -gentiobiosyl- (1->6) -glucoside                               | 44259397     |
| 5.7-methoxyflavanone                                                                            | 103143244    |
| 4'.5.7-trimethoxyflavone                                                                        | 79730        |
| Ethyl gallate                                                                                   | 13250        |
| zapotin                                                                                         | 629965       |
| Helichrysoside                                                                                  | 5317991      |
| 1.4-dihydro-4-oxo-3-(2-pyrrolidinyl)-2-quinolinecarboxylic acid                                 | 69114        |
| Afrormosin                                                                                      | 5281704      |
| Gibberellin A17                                                                                 | 5460657      |
| Quercetin                                                                                       | 5280343      |
| 1.3-bis-(5-carboxypentyl)-urea                                                                  | 246663       |
| 5-carboxyvanillic acid                                                                          | 16488        |
| 3-hydroxyflavone                                                                                | 11349        |
| Coniferaldehyde                                                                                 | 5280536      |
| Gibberellin A1/A34                                                                              | 5280379      |
| Isorhamnetin 3-o-alpha-l-[6'''-p-coumaroyl-beta-d-glucopyranosyl-(1->2)]-beta-d-glucopyranoside | 11018161     |
| Gibberellin A53                                                                                 | 440914       |
| 2'.5-digalloylhamamelofuranose                                                                  | 253775       |
| (+)-Catechin 7-o-beta-d-xyloside                                                                | 73533        |
| Digallic acid                                                                                   | 341          |
| (E)-ferulic acid                                                                                | 445858       |
| 1.3-dibutyl-1.3-dimethylurea                                                                    | 546287       |
| Kaempferol-3-o-(6'''-trans-p-coumaroyl-2''-glucosyl)rhamnoside                                  | 10032927     |
| Tomentosin                                                                                      | 155173       |
| Catechin gallate. (-)-                                                                          | 65064        |
| Quercetin-3-o-(6'''-trans-p-coumaroyl-2''-glucosyl)rhamnoside                                   | 10169367     |
| Gibberellin A24                                                                                 | 443454       |
| Glucogallin                                                                                     | 124375       |
| 5'-desgalloylstachyurin                                                                         | 10417809     |
| Gibberellin A12                                                                                 | 443450       |
| (+)-Gallocatechin                                                                               | 65084        |

|                                  |          |
|----------------------------------|----------|
| Isorhamnetin                     | 5281654  |
| Myricetin-3-o-glucoside          | 22841567 |
| 1.6-bis-o-galloyl-beta-d-glucose | 440221   |
| Vescalagin                       | 168165   |
