# Supplementary material for: Repurposing Castanea sativa By-Product Extract as a Potent Anti-inflammatory Agent
Source: Preprints.org preprint supplement (doi:10.20944/preprints202403.1600.v1), 2024-03-26
Supplement: Supplementary file 3 [file supplementary]

| Target Name                                            | UniProt ID and entry Name | PDB Code |
|--------------------------------------------------------|---------------------------|----------|
| C-C motif chemokine 3                                  | P10147 · CCL3_HUMAN       | 5COR     |
| Mitogen-activated protein kinase 14                    | Q16539 · MK14_HUMAN       | 6ZWP     |
| Triggering receptor expressed on myeloid cells 1       | Q9NP99 · TREM1_HUMAN      | 1SMO     |
| Arachidonate 5-lipoxygenase                            | P09917 · LOX5_HUMAN       | 7TTK     |
| Mitogen-activated Protein Kinase 11                    | Q15759 · MK11_HUMAN       | 4QTB     |
| Mitogen-activated protein kinase 3                     | P27361 · MK03_HUMAN       | 3ELJ     |
| Mitogen-activated protein kinase 8                     | P45983 · MK08_HUMAN       | 1CJY     |
| Cytosolic phospholipase A2                             | P47712 · PA24A_HUMAN      | 3HOF     |
| Interleukin-1 alpha                                    | P01583 · IL1A_HUMAN       | 5UC6     |
| Annexin A1                                             | P04083 · ANXA1_HUMAN      | 1AIN     |
| Methyl dehydroabietate                                 | Q9NR96 · TLR9_HUMAN       | 8AR3     |
| Apigenin                                               | P35354 · PGH2_HUMAN       | 5IKR     |
| Interleukin-8                                          | P10145 · IL8_HUMAN        | 6N2U     |
| Interleukin-23 subunit alpha                           | Q9NPF7 · IL23A_HUMAN      | 5MJ3     |
| cAMP-specific 3',5'-cyclic phosphodiesterase 4A        | P27815 · PDE4A_HUMAN      | 2QYK     |
| Receptor-interacting serine/threonine-protein kinase 1 | Q13546 · RIPK1_HUMAN      | 4NEU     |
| Interleukin-12 subunit beta                            | P29460 · IL12B_HUMAN      | 5MJ3     |
| Serine/threonine-protein kinase TBK1                   | Q9UHD2 · TBK1_HUMAN       | 6RSU     |
| Toll-like receptor 6                                   | Q9Y2C9 · TLR6_HUMAN       | 4OM7     |
| 72 kDa type IV collagenase                             | P08253 · MMP2_HUMAN       | 1RTG     |
| Prostaglandin G/H synthase 1                           | P23219 · PGH1_HUMAN       | 6Y3C     |
| Eicosapentanoic acid C20:5                             | P35354 · PGH2_HUMAN       | 5F19     |
| Docosahexaenoic acid C22:6                             | O60603 · TLR2_HUMAN       | 8AR0     |
| Glyceraldehyde-3-phosphate dehydrogenase               | P04406 · G3P_HUMAN        | 1U8F     |
| High mobility group protein B1                         | P09429 · HMGB1_HUMAN      | 2YRQ     |
| MAP kinase-activated protein kinase 2                  | P49137 · MAPK2_HUMAN      | 1KWP     |
| Tyrosine-protein kinase Fgr                            | P09769 · FGR_HUMAN        | 7JT9     |
| CCAAT/enhancer-binding protein beta                    | P17676 · CEBPB_HUMAN      | 7UPZ     |
| Macrophage colony-stimulating factor 1 receptor        | P07333 · CSF1R_HUMAN      | 6T2W     |
| Tyrosine-protein kinase SYK                            | P43405 · KSYK_HUMAN       | 4FL2     |
| Tyrosine-protein kinase Lyn                            | P07948 · LYN_HUMAN        | 6NMW     |
